# Supplementary material
Source: PubMed Central journal article supplement (PMC4135817)
Supplement: AAC.02830-14_zac008143165so1.pdf [file AAC.02830-14_zac008143165so1.pdf]

---

## Appendix C: Toxicity Table – DMID Adult toxicity Table, November, 2007

### **ABBREVIATIONS:** Abbreviations utilized in the Table:

|                                  |                             |
|----------------------------------|-----------------------------|
| ULN = Upper Limit of Normal      | LLN = Lower Limit of Normal |
| R <sub>x</sub> = Therapy         | Req = Required              |
| Mod = Moderate                   | IV = Intravenous            |
| ADL = Activities of Daily Living | Dec = Decreased             |

### **ESTIMATING SEVERITY GRADE**

For abnormalities NOT found elsewhere in the Toxicity Tables use the scale below to estimate grade of severity:

|                |                         |                                                                                                                                                              |
|----------------|-------------------------|--------------------------------------------------------------------------------------------------------------------------------------------------------------|
| <b>GRADE 1</b> | <b>Mild</b>             | Transient or mild discomfort (< 48 hours); no medical intervention/therapy required                                                                          |
| <b>GRADE 2</b> | <b>Moderate</b>         | Mild to moderate limitation in activity - some assistance may be needed; no or minimal medical intervention/therapy required                                 |
| <b>GRADE 3</b> | <b>Severe</b>           | Marked limitation in activity, some assistance usually required; medical intervention/therapy required, hospitalizations possible                            |
| <b>GRADE 4</b> | <b>Life-threatening</b> | Extreme limitation in activity, significant assistance required; significant medical intervention/therapy required, hospitalization or hospice care probable |

The grading of the laboratory AEs will be based on the DMID toxicity table.

**SERIOUS OR LIFE-THREATENING AEs**

ANY clinical event deemed by the clinician to be serious or life-threatening should be considered a grade 4 event. Clinical events considered to be serious or life-threatening include, but are not limited to: seizures, coma, tetany, diabetic ketoacidosis, disseminated intravascular coagulation, diffuse petechiae, paralysis, acute psychosis, severe depression.

| HEMATOLOGY                                   |                 |               |               |         |
|----------------------------------------------|-----------------|---------------|---------------|---------|
|                                              | Grade 1         | Grade 2       | Grade 3       | Grade 4 |
| Hemoglobin (gm/dL)                           |                 |               |               |         |
| Male, 18-21 yrs                              |                 |               |               |         |
| Male, > 21 yrs                               | 11.8-13.0       | 10.5-11.7     | 9.2-10.4      | < 9.2   |
| Female, 18-21 yrs                            | 12.5-13.7       | 11.2-12.4     | 9.9-11.1      | < 9.9   |
| Female, >21 yrs                              | 11.0-12.2       | 9.7-10.9      | 8.4-9.6       | <8.3    |
|                                              | 10.6-11.8       | 9.3-10.5      | 8.0-9.2       | <8.0    |
| Absolute Neutrophil Count (mm <sup>3</sup> ) | 1000-1490       | 750-999       | 500-749       | <500    |
| Platelets (mm <sup>3</sup> )                 | 100,000-125,000 | 50,000-99,999 | 20,000-49,999 | <20,000 |
| WBCs (mm <sup>3</sup> )                      |                 |               |               |         |
| Decrease                                     | 3,100-4,000     | 2,500-3,999   | 1,800-2,400   | <7,999  |
| Increase                                     | 11,100-13,000   | 15,000        |               |         |

| <b>CHEMISTRIES</b>                     |           |           |                                                                              |                                                                                                 |
|----------------------------------------|-----------|-----------|------------------------------------------------------------------------------|-------------------------------------------------------------------------------------------------|
|                                        | Grade 1   | Grade 2   | Grade 3                                                                      | Grade 4                                                                                         |
| Sodium (mEq/L)<br>Hyponatremia         | 130-134   | 123-129   | 116-122                                                                      | < 116 or abnormal sodium<br><i>with</i> mental status changes or<br>seizures                    |
| Sodium (mEq/L)<br>Hypernatremia        | 150-154   | 155-163   | 164-171                                                                      | > 171 or abnormal sodium<br><i>with</i> mental status changes or<br>seizures                    |
| Potassium (mEq/L)<br>Hypokalemia       | 3.0 - 3.4 | 2.5 - 2.9 | 2.0 - 2.4 or intensive<br>replacement therapy or<br>hospitalization required | < 2.0 or abnormal potassium<br><i>with</i><br>paresis, ileus or life-<br>threatening arrhythmia |
| Potassium (mEq/L)<br>Hyperkalemia      | 5.6 - 6.0 | 6.1 - 6.5 | 6.6 - 7.0                                                                    | > 7.0 or abnormal potassium<br><i>with</i> life-threatening<br>arrhythmia                       |
| Random Glucose (mg/dL)<br>Hypoglycemia | 50-59     | 40-49     | 30-39                                                                        | <30 or abnormal glucose <i>with</i><br>mental status changes or coma                            |

| <b>CHEMISTRIES (continued)</b>                                       |             |             |             |                                                                             |
|----------------------------------------------------------------------|-------------|-------------|-------------|-----------------------------------------------------------------------------|
|                                                                      | Grade 1     | Grade 2     | Grade 3     | Grade 4                                                                     |
| Glucose mg/dL<br>Hyperglycemia<br>(nonfasting and no prior diabetes) | 116 - 160   | 161- 250    | 251 - 500   | > 500 or abnormal glucose <i>with</i> ketoacidosis or seizures              |
| Calcium mg/dL<br>Hypocalcemia<br>(corrected for albumin)             | 8.2 - 7.8   | 7.7 - 7.0   | 6.9 - 6.1   | < 6.1 or abnormal calcium <i>with</i> life threatening arrhythmia or tetany |
| Calcium mg/dL<br>Hypercalcemia<br>(correct for albumin)              | 10.6 - 11.5 | 11.6 - 12.5 | 12.6 - 13.5 | > 13.5 or abnormal calcium <i>with</i> life threatening arrhythmia          |

| <b>CHEMISTRIES (continued)</b>                                                                          |                   |                   |                  |                                |
|---------------------------------------------------------------------------------------------------------|-------------------|-------------------|------------------|--------------------------------|
|                                                                                                         | Grade 1           | Grade 2           | Grade 3          | Grade 4                        |
| Bilirubin (mg/dl)<br>Hyperbilirubinemia (when accompanied by any increase in other liver function test) | 1.1 - <1.25 x ULN | 1.25 - <1.5 x ULN | 1.5 – 1.75 x ULN | > 1.75 x ULN                   |
| Bilirubin (mg/dl)<br>Hyperbilirubinemia (when other liver function are in the normal range)             | 1.1 - <1.5 x ULN  | 1.5 - <2.0 x ULN  | 2.0 – 3.0 x ULN  | > 3.0 x ULN                    |
| BUN                                                                                                     | 1.25 - 2.5 x ULN  | 2.6 - 5 x ULN     | 5.1 - 10 x ULN   | > 10 x ULN                     |
| Creatinine                                                                                              | 1.1 - 1.5 x ULN   | 1.6 - 3.0 x ULN   | 3.1 - 6 x ULN    | > 6 x ULN or dialysis required |

| <b>ENZYMES</b>       |                  |                  |                 |           |
|----------------------|------------------|------------------|-----------------|-----------|
|                      | Grade 1          | Grade 2          | Grade 3         | Grade 4   |
| AST (SGOT)           | 1.1 - <2.0 x ULN | 2.0 – <3.0 x ULN | 3.0 – 8.0 x ULN | > 8 x ULN |
| ALT (SGPT)           | 1.1 - <2.0 x ULN | 2.0 – <3.0 x ULN | 3.0 – 8.0 x ULN | > 8 x ULN |
| Alkaline Phosphatase | 1.1 - <2.0 x ULN | 2.0 – <3.0 x ULN | 3.0 – 8.0 x ULN | > 8 x ULN |

| <b>URINALYSIS</b> |                                    |                                |                                                             |                                               |
|-------------------|------------------------------------|--------------------------------|-------------------------------------------------------------|-----------------------------------------------|
|                   | Grade 1                            | Grade 2                        | Grade 3                                                     | Grade 4                                       |
| Proteinuria       | 1+<br>or<br>200 mg - 1 gm loss/day | 2-3+<br>or<br>1- 2 gm loss/day | 4+<br>or<br>2-3.5 gm loss/day                               | nephrotic syndrome<br>or<br>> 3.5 gm loss/day |
| Hematuria         | microscopic only<br>6-10rbc/hpf    | gross, no clots<br>>10 rbc/hpf | gross, with or without<br>clots, OR red blood<br>cell casts | obstructive or required<br>transfusion        |

| <b>CARDIOVASCULAR</b> |                                                   |                                                                     |                                                                                  |                                                                    |
|-----------------------|---------------------------------------------------|---------------------------------------------------------------------|----------------------------------------------------------------------------------|--------------------------------------------------------------------|
|                       | Grade 1                                           | Grade 2                                                             | Grade 3                                                                          | Grade 4                                                            |
| Cardiac Rhythm        |                                                   | asymptomatic,<br>transient signs, no<br>Rx required                 | recurrent/persistent;<br>symptomatic Rx required                                 | unstable dysrhythmia;<br>hospitalization and<br>treatment required |
| Hypertension          | transient increase<br>> 20 mm/Hg; no<br>treatment | recurrent, chronic<br>increase<br>> 20mm/Hg.<br>/treatment required | acute treatment required;<br>outpatient treatment or<br>hospitalization possible | end organ damage or<br>hospitalization required                    |

| <b>CARDIOVASCULAR (continued)</b> |                                                                                                                                          |                                                                                                                      |                                                 |                                                                                                                   |
|-----------------------------------|------------------------------------------------------------------------------------------------------------------------------------------|----------------------------------------------------------------------------------------------------------------------|-------------------------------------------------|-------------------------------------------------------------------------------------------------------------------|
|                                   | Grade 1                                                                                                                                  | Grade 2                                                                                                              | Grade 3                                         | Grade 4                                                                                                           |
| Hypotension                       | transient orthostatic hypotension with heart rate increased by <20 beat/min or decreased by <10 mm Hg systolic BP, No treatment required | symptoms due to orthostatic hypotension or BP decreased by <20 mm Hg systolic; correctable with oral fluid treatment | requires IV fluids; no hospitalization required | mean arterial pressure <60mm/ Hg or end organ damage or shock; requires hospitalization and vasopressor treatment |
| Pericarditis                      | minimal effusion                                                                                                                         | mild/moderate asymptomatic effusion, no treatment                                                                    | symptomatic effusion; pain; EKG changes         | tamponade; pericardiocentesis or surgery required                                                                 |
| Hemorrhage, Blood Loss            | microscopic/occult                                                                                                                       | mild, no transfusion                                                                                                 | gross blood loss; 1-2 units transfused          | massive blood loss; > 3 units transfused                                                                          |



| <b>RESPIRATORY</b>  |                                                                     |                                                                                               |                                                                                                       |                                                                       |
|---------------------|---------------------------------------------------------------------|-----------------------------------------------------------------------------------------------|-------------------------------------------------------------------------------------------------------|-----------------------------------------------------------------------|
|                     | Grade 1                                                             | Grade 2                                                                                       | Grade 3                                                                                               | Grade 4                                                               |
| Cough               | transient- no treatment                                             | persistent cough; treatment responsive                                                        | Paroxysmal cough; uncontrolled with treatment                                                         | -----                                                                 |
| Bronchospasm, Acute | transient; no treatment;<br>70% - 80% FEV <sub>1</sub> of peak flow | requires treatment; normalizes with bronchodilator; FEV <sub>1</sub> 50% - 70% (of peak flow) | no normalization with bronchodilator; FEV <sub>1</sub> 25% - 50% of peak flow; or retractions present | cyanosis: FEV <sub>1</sub> < 25% of peak flow or intubation necessary |
| Dyspnea             | dyspnea on exertion                                                 | dyspnea with normal activity                                                                  | dyspnea at rest                                                                                       | dyspnea requiring Oxygen therapy                                      |

| <b>GASTROINTESTINAL</b> |                                                                              |                                                                                  |                                                                                                                                      |                                                                                                  |
|-------------------------|------------------------------------------------------------------------------|----------------------------------------------------------------------------------|--------------------------------------------------------------------------------------------------------------------------------------|--------------------------------------------------------------------------------------------------|
|                         | Grade 1                                                                      | Grade 2                                                                          | Grade 3                                                                                                                              | Grade 4                                                                                          |
| Nausea                  | mild or transient;<br>maintains reasonable<br>intake                         | moderate discomfort; intake<br>decreased significantly; some<br>activity limited | no significant intake;<br>requires IV fluids                                                                                         | hospitalization required;                                                                        |
| Vomiting                | 1 episode in 24 hours                                                        | 2-5 episodes in 24 hours                                                         | >6 episodes in 24 hours<br>or needing IV fluids                                                                                      | physiologic<br>consequences requiring<br>hospitalization or<br>requiring parenteral<br>nutrition |
| Constipation            | requiring stool softener<br>or dietary modification                          | requiring laxatives                                                              | obstipation requiring<br>manual evacuation or<br>enema                                                                               | obstruction or toxic<br>megacolon                                                                |
| Diarrhea                | mild or transient; 3-4<br>loose stools/day or mild<br>diarrhea last < 1 week | moderate or persistent; 5-7<br>loose stools/day or diarrhea<br>lasting >1 week   | >7 loose stools/day or<br>bloody diarrhea; or<br>orthostatic hypotension<br>or electrolyte imbalance<br>or >2L IV fluids<br>required | hypotensive shock or<br>physiologic<br>consequences requiring<br>hospitalization                 |

---

| <b>GASTROINTESTINAL (continued)</b> |                                           |                                |                                                            |                                            |
|-------------------------------------|-------------------------------------------|--------------------------------|------------------------------------------------------------|--------------------------------------------|
|                                     | Grade 1                                   | Grade 2                        | Grade 3                                                    | Grade 4                                    |
| Oral Discomfort/Dysphagia           | mild discomfort; no difficulty swallowing | some limits on eating/drinking | eating/talking very limited; unable to swallow solid foods | unable to drink fluids; requires IV fluids |

| <b>NEUROLOGICAL</b>                      |                                                        |                                                                                     |                                                                                                 |                                                                                                   |
|------------------------------------------|--------------------------------------------------------|-------------------------------------------------------------------------------------|-------------------------------------------------------------------------------------------------|---------------------------------------------------------------------------------------------------|
|                                          | Grade 1                                                | Grade 2                                                                             | Grade 3                                                                                         | Grade 4                                                                                           |
| Neuro-Cerebellar                         | slight incoordination<br>dysdiadochokinesis            | intention tremor,<br>dysmetria, slurred<br>speech; nystagmus                        | locomotor ataxia                                                                                | incapacitated                                                                                     |
| Psychiatric                              | mild anxiety or depression                             | moderate anxiety or<br>depression; therapy<br>required; change in<br>normal routine | severe mood<br>changes requiring<br>therapy; or suicidal<br>ideation; or<br>aggressive ideation | acute psychosis requiring<br>hospitalization; or<br>suicidal gesture/attempt<br>or hallucinations |
| Muscle Strength                          | subjective weakness<br>no objective symptoms/<br>signs | mild objective<br>signs/symptoms<br>no decrease in function                         | objective weakness<br>function limited                                                          | paralysis                                                                                         |
| Paresthesia (burning,<br>tingling, etc.) | mild discomfort; no<br>treatment required              | moderate discomfort;<br>non-narcotic analgesia<br>required                          | severe discomfort;<br>or narcotic<br>analgesia required<br>with symptomatic<br>improvement      | incapacitating; or not<br>responsive to narcotic<br>analgesia                                     |

| <b>NEUROLOGICAL (continued)</b> |                                                                                                                                                                                                   |                                                                                                                                                               |                                                                                                                                                                                        |                                                               |
|---------------------------------|---------------------------------------------------------------------------------------------------------------------------------------------------------------------------------------------------|---------------------------------------------------------------------------------------------------------------------------------------------------------------|----------------------------------------------------------------------------------------------------------------------------------------------------------------------------------------|---------------------------------------------------------------|
|                                 | Grade 1                                                                                                                                                                                           | Grade 2                                                                                                                                                       | Grade 3                                                                                                                                                                                | Grade 4                                                       |
| Neuro-sensory                   | mild impairment in sensation (decreased sensation, e.g., vibratory, pinprick, hot/cold in great toes) in focal area or symmetrical distribution; or change in taste, smell, vision and/or hearing | moderate impairment (mod decreased sensation, e.g., vibratory, pinprick, hot/cold to ankles) and/or joint position or mild impairment that is not symmetrical | severe impairment (decreased or loss of sensation to knees or wrists) or loss of sensation of at least mod degree in multiple different body areas (i.e., upper and lower extremities) | sensory loss involves limbs and trunk; paralysis; or seizures |

| <b>MUSCULOSKELETAL</b>     |                                                                                             |                                                                                                                                  |                                                                                                            |                                              |
|----------------------------|---------------------------------------------------------------------------------------------|----------------------------------------------------------------------------------------------------------------------------------|------------------------------------------------------------------------------------------------------------|----------------------------------------------|
|                            | Grade 1                                                                                     | Grade 2                                                                                                                          | Grade 3                                                                                                    | Grade 4                                      |
| Arthralgia<br>(joint pain) | mild pain not interfering with function                                                     | moderate pain, analgesics and/or pain interfering with function but not with activities of daily living                          | severe pain; pain and/or analgesics interfering with activities of daily living                            | disabling pain                               |
| Arthritis                  | mild pain with inflammation, erythema or joint swelling – but not interfering with function | moderate pain with inflammation, erythema or joint swelling – interfering with function, but not with activities of daily living | severe pain with inflammation, erythema or joint swelling –and interfering with activities of daily living | permanent and/or disabling joint destruction |
| Myalgia                    | myalgia with no limitation of activity                                                      | muscle tenderness (at other than injection site) or with moderate impairment of activity                                         | severe muscle tenderness with marked impairment of activity                                                | frank myonecrosis                            |

| <b>SKIN</b>   |                                  |                                                |                                                  |                                                                                                                                        |
|---------------|----------------------------------|------------------------------------------------|--------------------------------------------------|----------------------------------------------------------------------------------------------------------------------------------------|
|               | Grade 1                          | Grade 2                                        | Grade 3                                          | Grade 4                                                                                                                                |
| Mucocutaneous | erythema; pruritus               | diffuse, maculo papular rash, dry desquamation | vesiculation or moist desquamation or ulceration | exfoliative dermatitis, mucous membrane involvement or erythema, multiforme or suspected Stevens-Johnson or necrosis requiring surgery |
| Induration    | < 15mm                           | 15-30 mm                                       | >30mm                                            |                                                                                                                                        |
| Erythema      | < 15mm                           | 15-30 mm                                       | >30mm                                            |                                                                                                                                        |
| Edema         | < 15mm                           | 15-30 mm                                       | >30mm                                            |                                                                                                                                        |
| Pruritus      | slight itching at injection site | moderate itching at injection extremity        | itching over entire body                         |                                                                                                                                        |

| <b>SYSTEMIC</b>   |                                       |                                                 |                                                  |                                                       |
|-------------------|---------------------------------------|-------------------------------------------------|--------------------------------------------------|-------------------------------------------------------|
|                   | Grade 1                               | Grade 2                                         | Grade 3                                          | Grade 4                                               |
| Allergic Reaction | pruritus without rash                 | localized urticaria                             | generalized urticaria;<br>angioedema             | anaphylaxis                                           |
| Headache          | mild, no treatment required           | transient, moderate;<br>treatment required      | severe; responds to initial<br>narcotic therapy  | intractable; requires<br>repeated narcotic<br>therapy |
| Fever: oral       | 37.7 - 38.5 C or<br>100.0 - 101.5 F   | 38.6 - 39.5 C or<br>101.6 - 102.9 F             | 39.6 - 40.5 C or<br>103 - 105 F                  | > 40 C or<br>> 105 F                                  |
| Fatigue           | normal activity reduced < 48<br>hours | normal activity decreased<br>25- 50% > 48 hours | normal activity<br>decreased > 50% can't<br>work | unable to care for self                               |



### Appendix D: Supplement Table for Labs & Reference Ranges

The table reference below is to be used as a supplement to the DMID Adult Toxicity Table, November 2007, to adjust the laboratory values listed in DMID Toxicity Tables for Grading Adverse Events in this trial to be consistent with JHH lab normals. Laboratory values listed in this table will supersede the DMID table for toxicity grading of laboratory values. For some values there is a gap between the upper or lower limits for that value and grade 1 toxicity. Abnormal values which fall into this gap (for which the abnormality is too small to reach Grade 1 toxicity) will not be reported as AEs.

| DMID 06-0091 Labs & Reference Ranges-<br>-JHH Lab |                    |                                  |           | DAIDS DEFINED SEVERITY GRADES FOR VALUES IN<br>DAIDS CHART, OTHERWISE SEE CODES |                  |                  |            |
|---------------------------------------------------|--------------------|----------------------------------|-----------|---------------------------------------------------------------------------------|------------------|------------------|------------|
| Test Name                                         | Reference<br>Range | APPENDIX B<br>EXPANDED<br>RANGES | HI-<br>LO | GRADE 1                                                                         | GRADE 2          | GRADE 3          | GRADE 4    |
| <b>Sodium</b>                                     | 135-148<br>mEq/L   |                                  | HI        | 149-150 mEq/L                                                                   | 151-154<br>mEq/L | 155-159<br>mEq/L | >160 mEq/L |
|                                                   |                    |                                  | LO        | 130-134 mEq/L                                                                   | 125-129<br>mEq/L | 121-124<br>mEq/L | <120 mEq/L |
|                                                   |                    |                                  |           |                                                                                 |                  |                  |            |
| <b>Potassium</b>                                  | 3.5-5.1 mEq/L      |                                  | HI        | 5.2-6.0 mEq/L                                                                   | 6.1-6.5<br>mEq/L | 6.6-7.0 mEq/L    | >7.0 mEq/L |
|                                                   |                    |                                  | LO        | 3.0-3.4 mEq/L                                                                   | 2.5-2.9<br>mEq/L | 2.0-2.4 mEq/L    | <2.0 mEq/L |
|                                                   |                    |                                  |           |                                                                                 |                  |                  |            |
| <b>Chloride</b>                                   | 96-109 mEq/L       |                                  | HI        | >112 mEq/L                                                                      |                  |                  |            |
|                                                   |                    |                                  | LO        | <93 mEq/L                                                                       |                  |                  |            |

| DMID 06-0091 Labs & Reference Ranges-<br>-JHH Lab |                        |                                  | DAIDS DEFINED SEVERITY GRADES FOR VALUES IN<br>DAIDS CHART, OTHERWISE SEE CODES |                    |                 |                |            |
|---------------------------------------------------|------------------------|----------------------------------|---------------------------------------------------------------------------------|--------------------|-----------------|----------------|------------|
| Test Name                                         | Reference Range        | APPENDIX B<br>EXPANDED<br>RANGES | HI-<br>LO                                                                       | GRADE 1            | GRADE 2         | GRADE 3        | GRADE 4    |
| <b>CO2</b>                                        | 21-31 mEq/L            |                                  | HI                                                                              | >31.0 mEq/L        |                 |                |            |
|                                                   |                        |                                  | LO                                                                              | 16.0-20.9 mEq/L    | 11.0-15.9 mEq/L | 8.0-10.9 mEq/L | <8.0 mEq/L |
| <b>Glucose (fasting)</b>                          | 60-99 mg/dL            | 56-115 mg/dL                     | HI                                                                              | 116-125 mg/dL      | 126-250 mg/dL   | 251-500 mg/dL  | >500 mg/dL |
|                                                   |                        |                                  | LO                                                                              | 41-59 mg/dL        | 31-40 mg/dL     | 21-30 mg/dL    | 0-20 mg/dL |
| <b>BUN</b>                                        | 7-22 mg/dL             |                                  | HI                                                                              | 26-40 mg/dL        | 41-50 mg/dL     | 51-60 mg/dL    | >60 mg/dL  |
|                                                   |                        |                                  | LO                                                                              | No ADE IF <7 mg/dL |                 |                |            |
| <b>Creatinine</b>                                 | Females: 0.5-1.2 mg/dL | 0-1.3 mg/dL                      | HI                                                                              | 1.4-1.6 mg/dL      | 1.7-2.2 mg/dL   | 2.3-4.1 mg/dL  | >4.1 mg/dL |
|                                                   | Males: 0.6-1.3 mg/dL   | 0-1.4 mg/dL                      | HI                                                                              | 1.5-1.7 mg/dL      | 1.8-2.3 mg/dL   | 2.4-4.4 mg/dL  | >4.4 mg/dL |

| DMID 06-0091 Labs & Reference Ranges-<br>-JHH Lab |                                           |                                  | DAIDS DEFINED SEVERITY GRADES FOR VALUES IN<br>DAIDS CHART, OTHERWISE SEE CODES |                        |                    |                    |                     |
|---------------------------------------------------|-------------------------------------------|----------------------------------|---------------------------------------------------------------------------------|------------------------|--------------------|--------------------|---------------------|
| Test Name                                         | Reference Range                           | APPENDIX B<br>EXPANDED<br>RANGES | HI-<br>LO                                                                       | GRADE 1                | GRADE 2            | GRADE 3            | GRADE 4             |
|                                                   |                                           |                                  |                                                                                 |                        |                    |                    |                     |
|                                                   |                                           |                                  | LO<br>*                                                                         | NO AE IF <0.6<br>mg/dL |                    |                    |                     |
|                                                   |                                           |                                  |                                                                                 |                        |                    |                    |                     |
| <b>Calcium</b>                                    | 8.4-10.5<br>mg/dL                         |                                  | HI                                                                              | 10.6-11.5<br>mg/dL     | 11.6-12.5<br>mg/dL | 12.6-13.5<br>mg/dL | >13.5 mg/dL         |
|                                                   |                                           |                                  | LO                                                                              | 7.8-8.3 mg/dL          | 7.0-7.7<br>mg/dL   | 6.1-6.9 mg/dL      | <6.1 mg/dL<br><br>1 |
|                                                   |                                           |                                  |                                                                                 |                        |                    |                    |                     |
| <b>Phosphate</b>                                  | 2.7-4.5 mg/dL                             |                                  | HI                                                                              | 4.6-5.0 mg/dL          | 5.1-5.5<br>mg/dL   | 5.5-6.4 mg/dL      | >6.5 mg/dL          |
|                                                   |                                           |                                  | LO                                                                              | 2.7- 2.4 mg/dL         | 1.8-2.1 mg/dL<br>1 | 1.0-1.7 mg/dL      | <1.00 mg/dL 1       |
|                                                   |                                           |                                  |                                                                                 |                        |                    |                    |                     |
| <b>Anion GAP</b>                                  | THIS IS A<br>DERIVED<br>NUMBER SO<br>AE'S |                                  |                                                                                 |                        |                    |                    |                     |

| DMID 06-0091 Labs & Reference Ranges-<br>-JHH Lab |                                   |                                  |           | DAIDS DEFINED SEVERITY GRADES FOR VALUES IN<br>DAIDS CHART, OTHERWISE SEE CODES |              |               |            |
|---------------------------------------------------|-----------------------------------|----------------------------------|-----------|---------------------------------------------------------------------------------|--------------|---------------|------------|
| Test Name                                         | Reference<br>Range                | APPENDIX B<br>EXPANDED<br>RANGES | HI-<br>LO | GRADE 1                                                                         | GRADE 2      | GRADE 3       | GRADE 4    |
|                                                   | DEFINED ON<br>COMPONENT<br>VALUES |                                  |           |                                                                                 |              |               |            |
| <b>Liver Panel</b>                                |                                   |                                  |           |                                                                                 |              |               |            |
| <b>Alanine Amino<br/>Transferase (ALT).</b>       | Females: 0-31<br>U/L              | 0-41 U/L                         | *         | 42-78 U/L                                                                       | 79-155 U/L   | 156-310 U/L   | >310 U/L   |
|                                                   | Males: 0-40<br>U/L                | 0-49 U/L                         | *         | 50-100 U/L                                                                      | 101-200 U/L  | 201-400 U/L   | >400 U/L   |
| <b>Alkaline Phosphatase</b>                       | 30-120 U/L                        | 0-154 U/L                        | *         | 155-300 U/L                                                                     | 301-600 U/L  | 601-1200 U/L  | >1200 U/L  |
| <b>Aspartate Amino<br/>Transferase (AST)</b>      | Females: <32<br>IU/L              | 0-45 IU/L                        | *         | 46-80 IU/L                                                                      | 81-160 IU/L  | 161-320 IU/L  | >320 IU/L  |
|                                                   | Males: <38<br>IU/L                | 0-47 IU/L                        | *         | 48-95 IU/L                                                                      | 96-190 IU/L  | 191-380 IU/L  | >380 IU/L  |
| <b>Albumin, Serum</b>                             | 3.5-5.3 g/dL                      |                                  | **        | 3.0-3.4 g/dL                                                                    | 2.0-2.9 g/dL | <2.0 g/dL     | NA         |
| <b>Gamma Glutamyl<br/>Transferase</b>             | Female: 8-51<br>IU/L              | 0-60 IU/L                        | *         | 61-128 IU/L                                                                     | 129-255 IU/L | 256-1020 IU/L | >1021 IU/L |
|                                                   | Male: 12-55<br>IU/L               | 0-65 IU/L                        |           | 66-139 IU/L                                                                     | 140-325 IU/L | 326-1100 IU/L | >1100 IU/L |
| <b>Lactic Dehydrogenase,</b>                      | Females: 122-                     | 0-220 U/L                        | *         | 221-550 U/L                                                                     | 551-1099 U/L | 1100-2199 U/L | >2199 U/L  |

| DMID 06-0091 Labs & Reference Ranges-<br>-JHH Lab |                         |                                  | DAIDS DEFINED SEVERITY GRADES FOR VALUES IN<br>DAIDS CHART, OTHERWISE SEE CODES |                     |                   |                   |            |
|---------------------------------------------------|-------------------------|----------------------------------|---------------------------------------------------------------------------------|---------------------|-------------------|-------------------|------------|
| Test Name                                         | Reference Range         | APPENDIX B<br>EXPANDED<br>RANGES | HI-<br>LO                                                                       | GRADE 1             | GRADE 2           | GRADE 3           | GRADE 4    |
| <b>Serum</b>                                      | 220 U/L                 |                                  |                                                                                 |                     |                   |                   |            |
|                                                   | Males 118-273<br>U/L    | 0-273 U/L                        | *                                                                               | 274-683 IU/L        | 684-1364<br>IU/L  | 1365-2729<br>IU/L | >2729 IU/L |
|                                                   |                         |                                  |                                                                                 |                     |                   |                   |            |
|                                                   |                         |                                  |                                                                                 |                     |                   |                   |            |
| <b>Total Protein</b>                              | 6.0-8.2 g/dL            |                                  | HI                                                                              | >8.3 g/dL           |                   |                   |            |
|                                                   |                         |                                  | LO                                                                              | <6.0 g/dL           |                   |                   |            |
|                                                   |                         |                                  |                                                                                 |                     |                   |                   |            |
| <b>C3 Serum</b>                                   | 79-152 mg/dL            |                                  | **                                                                              | <79 mg/dL           |                   |                   |            |
|                                                   |                         |                                  |                                                                                 |                     |                   |                   |            |
| <b>C4 Serum</b>                                   | 12-42 mg/dL             |                                  | **                                                                              | <12 mg/dL L         |                   |                   |            |
|                                                   |                         |                                  |                                                                                 |                     |                   |                   |            |
| <b>CH-50, Serum</b>                               | 31 - 66 U/mL            |                                  | **                                                                              | 10.00-30.99<br>U/mL | <10.00 U/mL       |                   |            |
|                                                   |                         |                                  |                                                                                 |                     |                   |                   |            |
| <b>Creatine Kinase (CK),<br/>Serum</b>            | Female: 24-<br>170 IU/L | 0-250 IU/L                       | *                                                                               | 510-1003 IU/L       | 1004-1699<br>IU/L | 1700-3399<br>IU/L | >3399 IU/L |
|                                                   | Male: 24-195<br>IU/L    | 0-275 IU/L                       | *                                                                               | 585-1151 IU/L       | 1152-1949<br>IU/L | 1950-3899<br>IU/L | >3899 IU/L |
|                                                   |                         |                                  |                                                                                 |                     |                   |                   |            |
| <b>CK MB Isoenzyme</b>                            | 0-3%                    |                                  |                                                                                 |                     |                   | >3% IU/L          |            |
|                                                   | 0-7 IU/ml               |                                  |                                                                                 |                     |                   | >7 IU/ml          |            |

| DMID 06-0091 Labs & Reference Ranges-<br>-JHH Lab |                    |                                  | DAIDS DEFINED SEVERITY GRADES FOR VALUES IN<br>DAIDS CHART, OTHERWISE SEE CODES |                                                 |                                                       |                                                      |                                             |
|---------------------------------------------------|--------------------|----------------------------------|---------------------------------------------------------------------------------|-------------------------------------------------|-------------------------------------------------------|------------------------------------------------------|---------------------------------------------|
| Test Name                                         | Reference Range    | APPENDIX B<br>EXPANDED<br>RANGES | HI-<br>LO                                                                       | GRADE 1                                         | GRADE 2                                               | GRADE 3                                              | GRADE 4                                     |
| <b>Fibrinogen,Quantitative</b>                    | 150-450 mg/dL      | 120-460 mg/dL                    | **                                                                              | 100-119 mg/dL                                   | 75-99 mg/dL                                           | 50-74 mg/dL                                          | <50 mg/dL                                   |
| <b>Haptoglobin</b>                                | 36-195 mg/dL       | 36-240 mg/dL                     | **                                                                              | 25-35 mg/dL                                     | 10-24 mg/dL                                           | <10 mg/dL                                            | —                                           |
| <b>Internation Normalized Ratio ( INR)</b>        | INR: 0.9-1.1 Units |                                  | *                                                                               | 1.2-1.5 Units                                   | 1.6-2.0 Units                                         | 2.1-3.0 Units                                        | >3.0 Units                                  |
| <b>APTT</b>                                       | 22.4-29.5 seconds  | 20-30.6 seconds                  | *                                                                               | 30.7--45 seconds                                | 46-65 seconds                                         | 66-100 seconds                                       | >100 seconds                                |
| <b>Kaolin Clotting Time</b>                       | 50-130 Units       |                                  | *                                                                               | >130 Units                                      |                                                       |                                                      |                                             |
| <b>Heme-8:</b>                                    |                    |                                  |                                                                                 |                                                 |                                                       |                                                      |                                             |
| <b>Hemoglobin (HGB)</b>                           |                    |                                  |                                                                                 |                                                 |                                                       |                                                      |                                             |
| Female 18-21 g/dL                                 | 12.4-14.8 g/dL     | 11.5-16 g/dL                     | **                                                                              | 9.5—11.4 g/dL<br>OR DECREASE<br>BY 1.0-1.5 g/dL | 8.0-9.4 g/dL<br>OR<br>DECREASE<br>BY 1.6-2.5<br>g/dL  | 6.5-7.9 g/dL<br>OR<br>DECREASE<br>BY 2.6-4.0<br>g/dL | <6.5 g/dL<br>OR<br>DECREASE<br>BY >4.0 g/dL |
| Female >21 g/dL                                   | 13.9-16.3 g/dL     | 11.5-16 g/dL                     | **                                                                              | 9.5-11.4 g/dL<br>OR DECREASE<br>BY 1.0-1.5 g/dL | 8.0 -9.4 g/dL<br>OR<br>DECREASE<br>BY 1.6-2.5<br>g/dL | 6.5-7.9 g/dL<br>OR<br>DECREASE<br>BY 2.6-4.0<br>g/dL | <6.5 g/dL OR<br>DECREASE<br>BY >4.0 g/dL    |

| DMID 06-0091 Labs & Reference Ranges-<br>-JHH Lab |                              |                                        | DAIDS DEFINED SEVERITY GRADES FOR VALUES IN<br>DAIDS CHART, OTHERWISE SEE CODES |                                                 |                                                      |                                                        |                                          |
|---------------------------------------------------|------------------------------|----------------------------------------|---------------------------------------------------------------------------------|-------------------------------------------------|------------------------------------------------------|--------------------------------------------------------|------------------------------------------|
| Test Name                                         | Reference Range              | APPENDIX B<br>EXPANDED<br>RANGES       | HI-<br>LO                                                                       | GRADE 1                                         | GRADE 2                                              | GRADE 3                                                | GRADE 4                                  |
| Male 18-21 g/dL                                   | 13.2-15.6 g/dL               | 11.5-17.3 g/dL                         | **                                                                              | 9.5-11.4 g/dL<br>OR DECREASE<br>BY 1.0-1.5 g/dL | 8.0-9.4 g/dL<br>OR<br>DECREASE<br>BY 1.6-2.5<br>g/dL | 6.5-7.9 g/dL<br>OR<br>DECREASE<br>BY 2.6-4.0dL<br>g/dL | <6.5 g/dL OR<br>DECREASE<br>BY >4.0 g/dL |
| Male>21 g/dL                                      | 13.9-16.3 g/dL               | 11.5-17.3 g/dL                         | **                                                                              | 9.5-11.4 g/dL<br>OR DECREASE<br>BY 1.0-1.5 g/dL | 8.0-9.4 g/dL<br>OR<br>DECREASE<br>BY 1.6-2.5<br>g/dL | 6.5-7.9 g/dL<br>OR<br>DECREASE<br>BY 2.6-4.0<br>g/dL   | <6.5 g/dL OR<br>DECREASE<br>BY >4.0 g/dL |
| <b>Hematocrit (Packed Cell<br/>Volume)</b>        | Female: 36.0-<br>46.0%       | GRADE THE<br>SAME AS THE<br>HEMOGLOBIN |                                                                                 |                                                 |                                                      |                                                        |                                          |
|                                                   | Male: 41.0-<br>53.0%         | GRADE THE<br>SAME AS THE<br>HEMOGLOBIN |                                                                                 |                                                 |                                                      |                                                        |                                          |
| <b>Erythrocyte count (RBC)</b>                    | Adult Female:<br>4.0 - 5.2 % | GRADE SAME AS<br>HEMOGLOBIN            |                                                                                 |                                                 |                                                      |                                                        |                                          |
|                                                   | Adult Male:<br>4.5 - 5.9 %   | GRADE SAME AS<br>HEMOGLOBIN            |                                                                                 |                                                 |                                                      |                                                        |                                          |
| <b>Erythrocyte count ( RBC)</b>                   | 4.0-5.2 * X10<br>6/cu mm     | GRADE SAME<br>AS<br>HEMOGLOBIN         |                                                                                 |                                                 |                                                      |                                                        |                                          |
| <b>Leukocyte Count (WBC)</b>                      |                              |                                        |                                                                                 |                                                 |                                                      |                                                        |                                          |

| DMID 06-0091 Labs & Reference Ranges-<br>-JHH Lab |                             |                                  | DAIDS DEFINED SEVERITY GRADES FOR VALUES IN<br>DAIDS CHART, OTHERWISE SEE CODES |                                 |                            |                            |                       |
|---------------------------------------------------|-----------------------------|----------------------------------|---------------------------------------------------------------------------------|---------------------------------|----------------------------|----------------------------|-----------------------|
| Test Name                                         | Reference Range             | APPENDIX B<br>EXPANDED<br>RANGES | HI-<br>LO                                                                       | GRADE 1                         | GRADE 2                    | GRADE 3                    | GRADE 4               |
| 18-21 YEARS                                       | 4500- 13000<br>cells/cu mm  | 3000-13,500<br>cells/cu mm       | HI                                                                              | >13,500 cells/cu<br>mm          |                            |                            |                       |
| 18-21 YEARS                                       | 4500- 13000<br>cells/cu mm  | 3000-13,500<br>cells/cu mm       | LO                                                                              | 2,000-2,500<br>cells/cu mm      | 1,500-1,999<br>cells/cu mm | 1,000-1,499<br>cells/cu mm | <1,000<br>cells/cu mm |
| >21 YEARS                                         |                             |                                  | HI                                                                              | >11,500 cells/cu<br>mm          |                            |                            |                       |
| >21 YEARS                                         | 4500 – 11000<br>cells/cu mm | 3000-11,500<br>cells/cu mm       | LO                                                                              | 2,000-2,500<br>cells/cu mm      | 1,500-1,999<br>cells/cu mm | 1,000-1,499<br>cells/cu mm | <1,000<br>cells/cu mm |
| <b>Differential %</b>                             |                             |                                  |                                                                                 |                                 |                            |                            |                       |
| <b>Neutrophils</b>                                | 40-70%                      |                                  |                                                                                 | DEFER TO ABSOLUTE<br>NUMBERS    |                            |                            |                       |
| <b>Immature Forms</b>                             | 0-1%                        |                                  |                                                                                 | DEFER TO<br>ABSOLUTE<br>NUMBERS |                            |                            |                       |
| <b>Lymphocytes</b>                                | 24-44%                      |                                  |                                                                                 | DEFER TO<br>ABSOLUTE<br>NUMBERS |                            |                            |                       |
| <b>Monocytes</b>                                  | 2-11%                       |                                  |                                                                                 | DEFER TO<br>ABSOLUTE<br>NUMBERS |                            |                            |                       |
| <b>Eosinophils</b>                                | 1-4%                        |                                  |                                                                                 | DEFER TO<br>ABSOLUTE            |                            |                            |                       |



| DMID 06-0091 Labs & Reference Ranges-<br>-JHH Lab |                              |                                  | DAIDS DEFINED SEVERITY GRADES FOR VALUES IN<br>DAIDS CHART, OTHERWISE SEE CODES |                                 |                                 |                                  |                             |
|---------------------------------------------------|------------------------------|----------------------------------|---------------------------------------------------------------------------------|---------------------------------|---------------------------------|----------------------------------|-----------------------------|
| Test Name                                         | Reference Range              | APPENDIX B<br>EXPANDED<br>RANGES | HI-<br>LO                                                                       | GRADE 1                         | GRADE 2                         | GRADE 3                          | GRADE 4                     |
|                                                   |                              |                                  |                                                                                 | NUMBERS                         |                                 |                                  |                             |
| <b>Basophils</b>                                  | 0-2%                         |                                  |                                                                                 | DEFER TO<br>ABSOLUTE<br>NUMBERS |                                 |                                  |                             |
| <b>Differential Counts</b>                        |                              |                                  |                                                                                 |                                 |                                 |                                  |                             |
| <b>Neutrophils</b>                                | 1500-7800<br>NUMBER/CU<br>MM |                                  | HI                                                                              | >7800<br>NUMBER/CU<br>MM        |                                 |                                  |                             |
|                                                   |                              |                                  | LO                                                                              | 1000-1300<br>NUMBER/CU<br>MM    | 750-999<br>NUMBER/C<br>U MM     | 500-749<br>NUMBER/CU<br>MM       | <500<br>NUMBER/C<br>U MM    |
| <b>Immature Forms</b>                             | 0-50<br>NUMBER/CU<br>MM      |                                  | *                                                                               | 51-365<br>NUMBER/CU<br>MM       | >365<br>NUMBER/C<br>U MM        |                                  |                             |
| <b>Lymphocytes</b>                                | 1100-4800<br>NUMBER/CU<br>MM |                                  | HI                                                                              | 6,000-7999<br>NUMBER/CU<br>MM   | 8000-11,999<br>NUMBER/C<br>U MM | 12,000-20,000<br>NUMBER/CU<br>MM | >20,000<br>NUMBER/C<br>U MM |
|                                                   |                              |                                  | LO                                                                              | 600-650<br>NUMBER/CU<br>MM      | 500-599<br>NUMBER/C<br>U MM     | 350-499<br>NUMBER/CU<br>MM       | <350<br>NUMBER/C<br>U MM    |

| DMID 06-0091 Labs & Reference Ranges-<br>-JHH Lab |                             |                                  | DAIDS DEFINED SEVERITY GRADES FOR VALUES IN<br>DAIDS CHART, OTHERWISE SEE CODES |                            |                             |                             |                           |
|---------------------------------------------------|-----------------------------|----------------------------------|---------------------------------------------------------------------------------|----------------------------|-----------------------------|-----------------------------|---------------------------|
| Test Name                                         | Reference Range             | APPENDIX B<br>EXPANDED<br>RANGES | HI-<br>LO                                                                       | GRADE 1                    | GRADE 2                     | GRADE 3                     | GRADE 4                   |
| <b>Monocytes</b>                                  | 100-1200<br>NUMBER/CU<br>MM |                                  | *                                                                               | >1200<br>NUMBER/CU<br>MM   |                             |                             |                           |
| <b>Eosinophils</b>                                | 120-300<br>NUMBER/CU<br>MM  | 90-300                           | *                                                                               | 301-599<br>NUMBER/CU<br>MM | 600-899<br>NUMBER/C<br>U MM | 900-3000<br>NUMBER/CU<br>MM | >3000<br>NUMBER/C<br>U MM |
| <b>Basophils</b>                                  |                             |                                  | *                                                                               | >300<br>NUMBER/CU<br>MM    |                             |                             |                           |
| <b>Nucleated RBC's</b>                            | 0 - 12<br>NUMBER/CU<br>MM   |                                  | *                                                                               | 13-30<br>NUMBER/CU<br>MM   | 31-60<br>NUMBER/C<br>U MM   | 61-120<br>NUMBER/CU<br>MM   | > 120<br>NUMBER/C<br>U MM |
| <b>Mean Corpuscular Hemoglobin (MCH),</b>         | 26.0-34.0<br>pg/Cell        |                                  | **                                                                              | 22.1-24.0<br>pg/Cell       | 20.1-22.0<br>pg/Cell        | <20.1 pg/Cell               |                           |
| <b>MCHC</b>                                       | 31.0-37.0 g/dL              |                                  |                                                                                 | DERIVED<br>VALUES          |                             |                             |                           |
| <b>MCV</b>                                        |                             |                                  |                                                                                 |                            |                             |                             |                           |

| DMID 06-0091 Labs & Reference Ranges-<br>-JHH Lab |                                    |                                  |           | DAIDS DEFINED SEVERITY GRADES FOR VALUES IN<br>DAIDS CHART, OTHERWISE SEE CODES |                                     |                              |                        |
|---------------------------------------------------|------------------------------------|----------------------------------|-----------|---------------------------------------------------------------------------------|-------------------------------------|------------------------------|------------------------|
| Test Name                                         | Reference Range                    | APPENDIX B<br>EXPANDED<br>RANGES | HI-<br>LO | GRADE 1                                                                         | GRADE 2                             | GRADE 3                      | GRADE 4                |
| <b>Male</b>                                       | 78.0-98.0 fL                       |                                  | HI        | >98 fL                                                                          |                                     |                              |                        |
|                                                   |                                    |                                  | LO        | <78 fL                                                                          |                                     |                              |                        |
| <b>Female</b>                                     | 80.0-100.0 fL                      |                                  | HI        | >100 fL                                                                         |                                     |                              |                        |
|                                                   |                                    |                                  | LO        | <80 fL                                                                          |                                     |                              |                        |
| <b>RDW</b>                                        | 11.5 - 14.5 %                      |                                  |           | DERIVED<br>VALUES                                                               |                                     |                              |                        |
| <b>Platelets</b>                                  | 150,000-<br>350,000<br>cells/cu mm |                                  | HI        | >351,000-<br>450,000 cells/cu<br>mm                                             | >451,000-<br>550,000<br>cells/cu mm | >550,000<br>cells/cu mm      |                        |
|                                                   |                                    |                                  | LO        | 100,000-<br>124,999 cells/cu<br>mm                                              | 50,000-99,999<br>cells/cu mm        | 25,000-49,999<br>cells/cu mm | <25,000<br>cells/cu mm |
| <b>Mean Platelet Volume<br/>(MPV)</b>             |                                    |                                  |           | DERIVED<br>VALUE                                                                |                                     |                              |                        |
| <b>Reticulocyte Count %</b>                       | 0.5-1.8%                           |                                  |           | DERIVED. USE<br>ABSOLUTE<br>RETICS                                              |                                     |                              |                        |
| <b>Reticulocyte Count<br/>(Absolute)</b>          | 24,100-87,700<br>K/cu mm           |                                  | *         | >87,700 K/cu<br>mm                                                              |                                     |                              |                        |

| DMID 06-0091 Labs & Reference Ranges-<br>-JHH Lab |                     |                                  |           | DAIDS DEFINED SEVERITY GRADES FOR VALUES IN<br>DAIDS CHART, OTHERWISE SEE CODES |              |              |           |
|---------------------------------------------------|---------------------|----------------------------------|-----------|---------------------------------------------------------------------------------|--------------|--------------|-----------|
| Test Name                                         | Reference<br>Range  | APPENDIX B<br>EXPANDED<br>RANGES | HI-<br>LO | GRADE 1                                                                         | GRADE 2      | GRADE 3      | GRADE 4   |
| <b>LDH Isoenzymes</b>                             |                     |                                  |           |                                                                                 |              |              |           |
|                                                   | LD-1: 26-45<br>IU/L |                                  | *         | 46-113 IU/L                                                                     | 114-225 IU/L | 226-450 IU/L | >450 IU/L |
|                                                   | LD-2: 44-75<br>IU/L |                                  | *         | 45-188 IU/L                                                                     | 189-375 IU/L | 376-750 IU/L | >750 IU/L |
|                                                   | LD-3: 20-41<br>IU/L |                                  | *         | 42-123 IU/L                                                                     | 124-205 IU/L | 206-410 IU/L | >410 IU/L |
|                                                   | LD-4: 8-22<br>IU/L  |                                  | *         | 23-55 IU/L                                                                      | 56-110 IU/L  | 111-220 IU/L | >220 IU/L |
|                                                   | LD-5: 6-29<br>IU/L  |                                  | *         | 30-73 IU/L                                                                      | 74-145 IU/L  | 146-290 IU/L | >290 IU/L |
| <b>Alkaline Phosphatase<br/>Isoenzyme</b>         |                     |                                  |           |                                                                                 |              |              |           |
| <b>Intestinal</b>                                 | 1-24%               |                                  | *         | >24 %                                                                           |              |              |           |
| <b>Bone</b>                                       | 28-66%              |                                  | HI        | >67 %                                                                           |              |              |           |
|                                                   |                     |                                  | LO        | <28%                                                                            |              |              |           |
| <b>Liver</b>                                      | 25-69%              |                                  | HI        | >70 %                                                                           |              |              |           |
|                                                   |                     |                                  | LO        | <25%                                                                            |              |              |           |
| <b>Urine Creatinine</b>                           |                     |                                  |           |                                                                                 |              |              |           |
| <b>Males</b>                                      | 40-278 mg/dL        |                                  | *         | 279-556 mg/dL<br>(2x uLN)                                                       | >556 mg/dL   |              |           |
| <b>Females</b>                                    | 29-226 mg/dL        |                                  | *         | 227-452 mg/dL<br>(2x ULN)                                                       | >452 mg/dL   |              |           |

| DMID 06-0091 Labs & Reference Ranges-<br>-JHH Lab |                 |                                  |           | DAIDS DEFINED SEVERITY GRADES FOR VALUES IN<br>DAIDS CHART, OTHERWISE SEE CODES |                |                         |                          |
|---------------------------------------------------|-----------------|----------------------------------|-----------|---------------------------------------------------------------------------------|----------------|-------------------------|--------------------------|
| Test Name                                         | Reference Range | APPENDIX B<br>EXPANDED<br>RANGES | HI-<br>LO | GRADE 1                                                                         | GRADE 2        | GRADE 3                 | GRADE 4                  |
|                                                   |                 |                                  |           |                                                                                 |                |                         |                          |
| <b>Urinalysis</b>                                 |                 |                                  | ***       |                                                                                 |                |                         |                          |
| <b>Urine Sodium (Spot)</b>                        |                 |                                  |           |                                                                                 |                |                         |                          |
| <b>Females&lt;40 years of age</b>                 | 15-267 mEq/L    |                                  | HI!       | >325                                                                            |                |                         |                          |
| <b>Females&gt;40 years of age</b>                 | 15-237 mEq/L    |                                  | LO<br>!   | <10                                                                             |                |                         |                          |
| <b>Males&lt;40 years of age</b>                   | 25-301 mEq/L    |                                  | HI!       | >235                                                                            |                |                         |                          |
| <b>Males &gt;40 years of age</b>                  | 18-214 mEq/L    |                                  | LO<br>!   | <10                                                                             |                |                         |                          |
|                                                   |                 |                                  |           |                                                                                 |                |                         |                          |
| <b>Specific gravity</b>                           | 1.003-1.030     |                                  | HI        | >1.030                                                                          |                |                         |                          |
|                                                   |                 |                                  | LO        | <1.003                                                                          |                |                         |                          |
|                                                   |                 |                                  |           |                                                                                 |                |                         |                          |
| <b>Protein</b>                                    | Negative-trace  |                                  |           | 1+                                                                              | 2-3+           | 4+                      | N/A                      |
|                                                   |                 |                                  |           |                                                                                 |                |                         |                          |
| <b>Hematuria</b>                                  | 0-5 rbc/hpf     |                                  | ***       | 6-10 rbc/hpf                                                                    | >10<br>RBC/HPF | Gross Blood or<br>casts | Transfusion<br>Indicated |
|                                                   |                 |                                  |           |                                                                                 |                |                         |                          |
| <b>ALL OTHER DIPSTICK<br/>ANALYTES</b>            | Negative        |                                  | ***       | Positive                                                                        |                |                         |                          |
|                                                   |                 |                                  |           |                                                                                 |                |                         |                          |
| <b>Leukocytes</b>                                 | 0-5 WBC         |                                  |           | >5WBC/hpf                                                                       |                |                         |                          |
|                                                   |                 |                                  |           |                                                                                 |                |                         |                          |
| <b>Crystals (multiple types)</b>                  | None            |                                  |           | >1 Number/hpf                                                                   |                |                         |                          |

| <b>DMID 06-0091 Labs &amp; Reference Ranges-<br/>-JHH Lab</b> |                            |                                           |                   | <b>DAIDS DEFINED SEVERITY GRADES FOR VALUES IN<br/>DAIDS CHART, OTHERWISE SEE CODES</b> |                |                |                |
|---------------------------------------------------------------|----------------------------|-------------------------------------------|-------------------|-----------------------------------------------------------------------------------------|----------------|----------------|----------------|
| <b>Test Name</b>                                              | <b>Reference<br/>Range</b> | <b>APPENDIX B<br/>EXPANDED<br/>RANGES</b> | <b>HI-<br/>LO</b> | <b>GRADE 1</b>                                                                          | <b>GRADE 2</b> | <b>GRADE 3</b> | <b>GRADE 4</b> |
|                                                               | Number/hpf                 |                                           |                   |                                                                                         |                |                |                |
| <b>Granular Casts</b>                                         | None<br>Number/hpf         |                                           |                   | >1 Number/hpf                                                                           |                |                |                |
| <b>Hyaline Casts</b>                                          | None<br>Number/hpf         |                                           |                   | >1 Number/hpf                                                                           |                |                |                |
